# Supplementary material
Source: Springer Nature journal article supplement (https://www.springermedizin.de/resource/supplementary/12891_2009_724_MOESM3_ESM.pdf/9506264)

a)

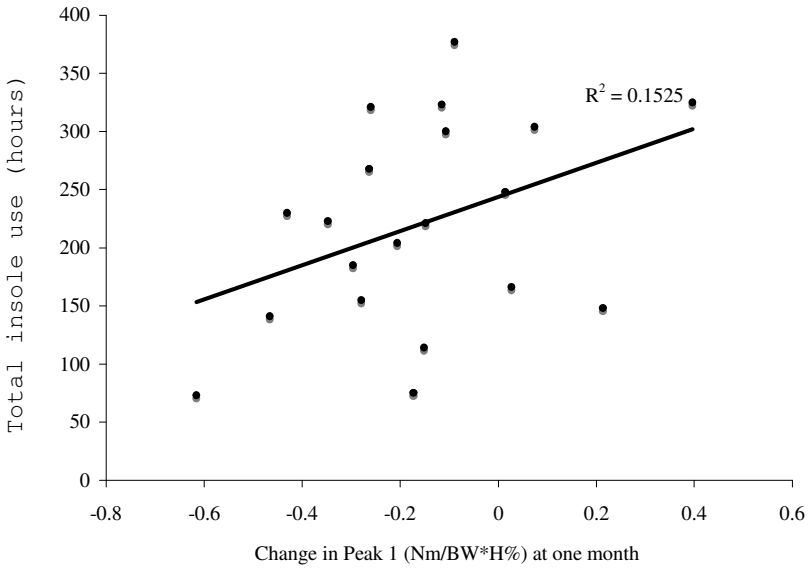

b)

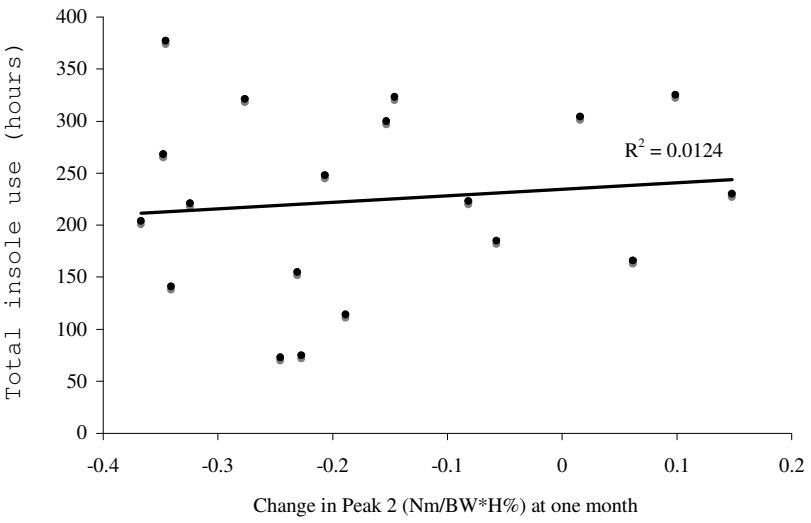

c)

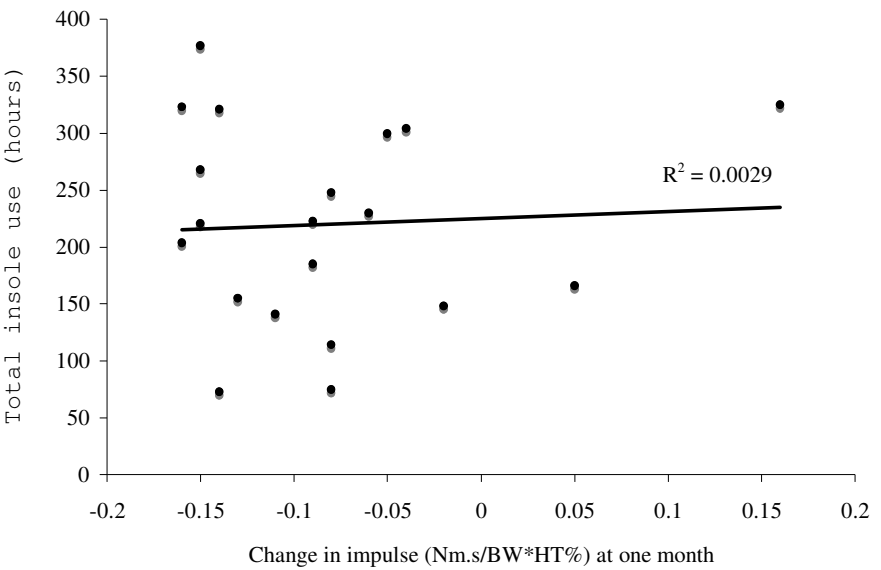

Supplement: MOESM3 [file 9506264]
